# Supplementary material for: Profile of outer membrane proteins of carbapenem-resistant Gram-negative bacilli in Ghana
Source: Springer Nature journal article supplement (doi:10.1186/s13104-024-07070-6), 2025-02-01
Supplement: MOESM1 [file 13104_2024_7070_MOESM1_ESM.pdf]

**Profile of outer membrane proteins of carbapenem-resistant Gram-negative bacilli in Ghana**

CODJOE, Francis S., KOTEY, Fleischer C. N. and DONKOR, Eric S.

Available from Sheffield Hallam University Research Archive (SHURA) at:

<https://shura.shu.ac.uk/34818/>

---

This document is the Supplemental Material

**Citation:**

CODJOE, Francis S., KOTEY, Fleischer C. N. and DONKOR, Eric S. (2025). Profile of outer membrane proteins of carbapenem-resistant Gram-negative bacilli in Ghana. *BMC Research Notes*, 18 (1): 49. [Article]

---

**Copyright and re-use policy**

See <http://shura.shu.ac.uk/information.html>

A

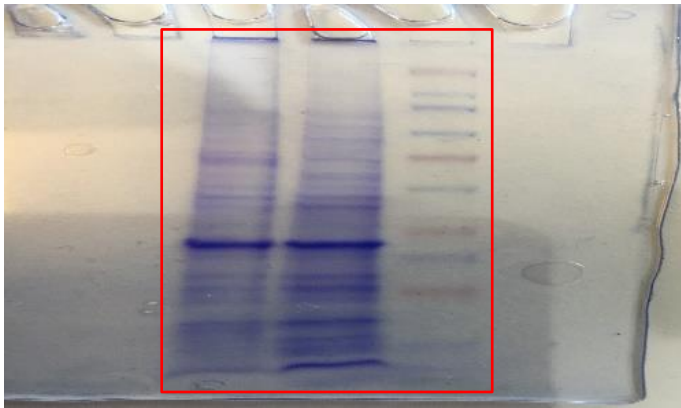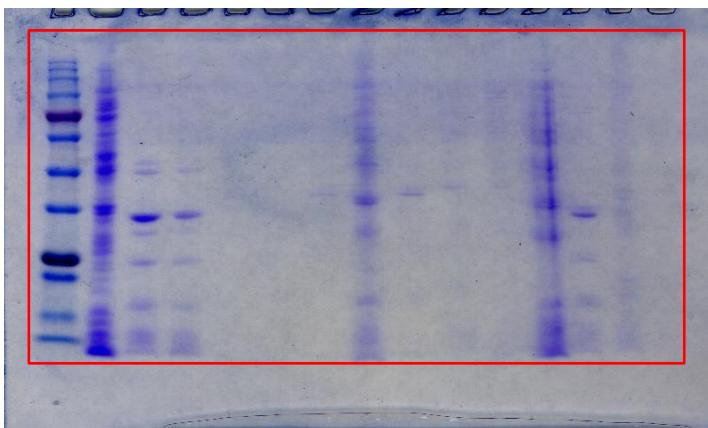

**Supplementary Figure 1. Representative outer membrane proteins of control strains and carbapenem-resistant isolates on SDS-PAGE**

Original gel image: 1<sup>st</sup>Protein ladder; the rest numbered from 85 to 98.  
Red outlines indicate cropped areas.

**B**

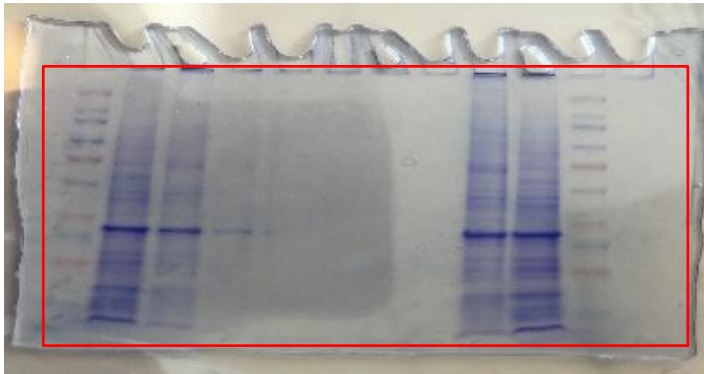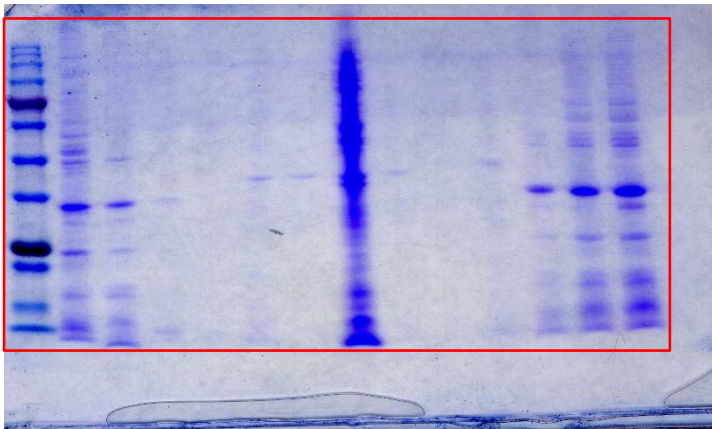

**Supplementary Figure 1 cont'd. Representative outer membrane proteins of control strains and carbapenem-resistant isolates on SDS-PAGE**

Original gel image: 1<sup>st</sup> Protein ladder; the rest numbered from 99 to 111.

Red outlines indicate cropped areas.
